# Supplementary material
Source: MDPI journal article supplement (https://www.mdpi.com/2410-3888/9/3/91)
Supplement: s1 [file s1]

**Table S1.** The probability of survival within 7 days

1

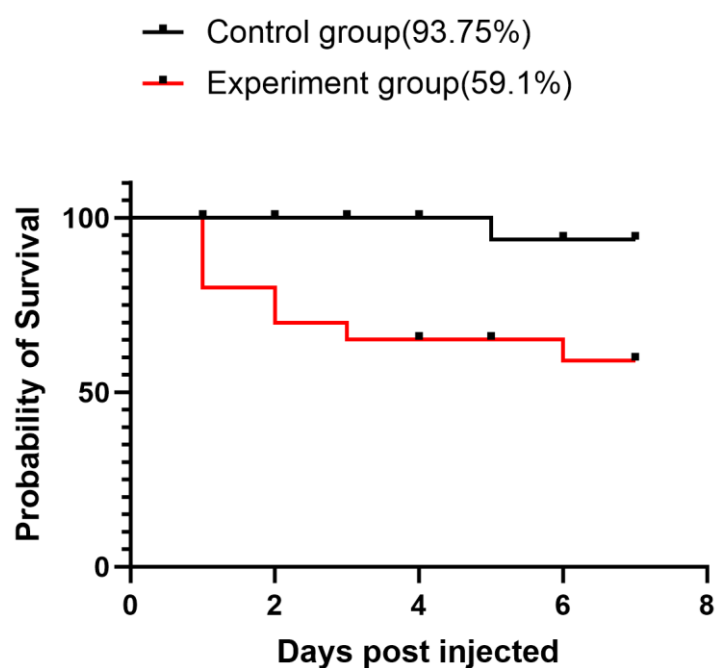

2

**Table S2.** Data of RNA-seq

3

| Sample  | RawDatas | CleanData(%)      | LowQuality(%)  |
|---------|----------|-------------------|----------------|
| K-48-1  | 47753060 | 47446946 (99.36%) | 266958 (0.56%) |
| K-48-2  | 38889110 | 38684846 (99.47%) | 181574 (0.47%) |
| K-48-3  | 38604484 | 38395500 (99.46%) | 184456 (0.48%) |
| KE-48-1 | 39520362 | 39308420 (99.46%) | 184330 (0.47%) |
| KE-48-2 | 48265518 | 47946866 (99.34%) | 282456 (0.59%) |
| KE-48-3 | 41495260 | 41274004 (99.47%) | 192802 (0.46%) |
| L-48-1  | 40172522 | 39956432 (99.46%) | 183932 (0.46%) |
| L-48-2  | 45829704 | 45614952 (99.53%) | 190136 (0.41%) |
| L-48-3  | 39742994 | 39552752 (99.52%) | 171426 (0.43%) |
| LE-48-1 | 38716820 | 38520950 (99.49%) | 15540 (0.04%)  |
| LE-48-2 | 43943394 | 43724926 (99.50%) | 22706 (0.05%)  |
| LE-48-3 | 36814860 | 36637164 (99.52%) | 17318 (0.05%)  |

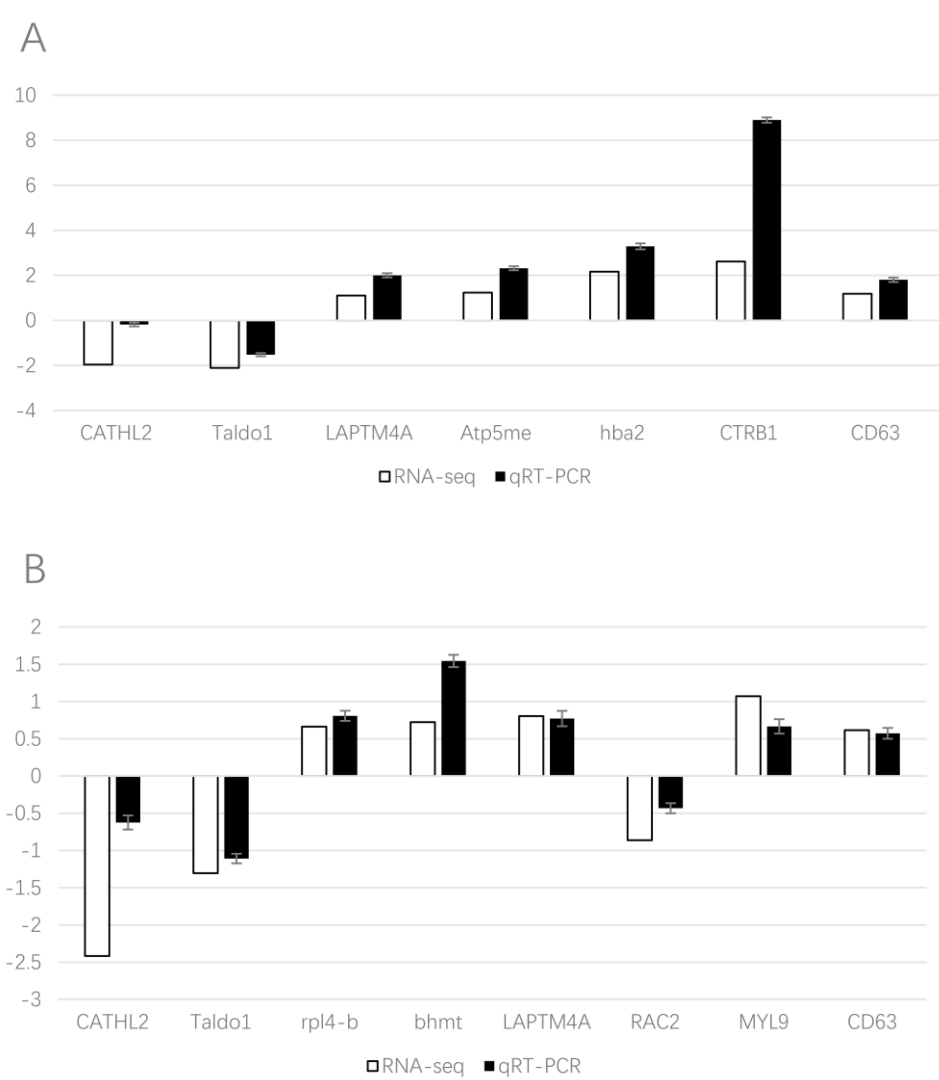

Fig. S1. Quantitative real-time RT-PCR for validation of RNA-seq. The expressions of these genes were detected by RNA-seq (white column) and qRT-PCR (black column). A and B represent the data of qRT-PCR in liver and kidney, respectively.

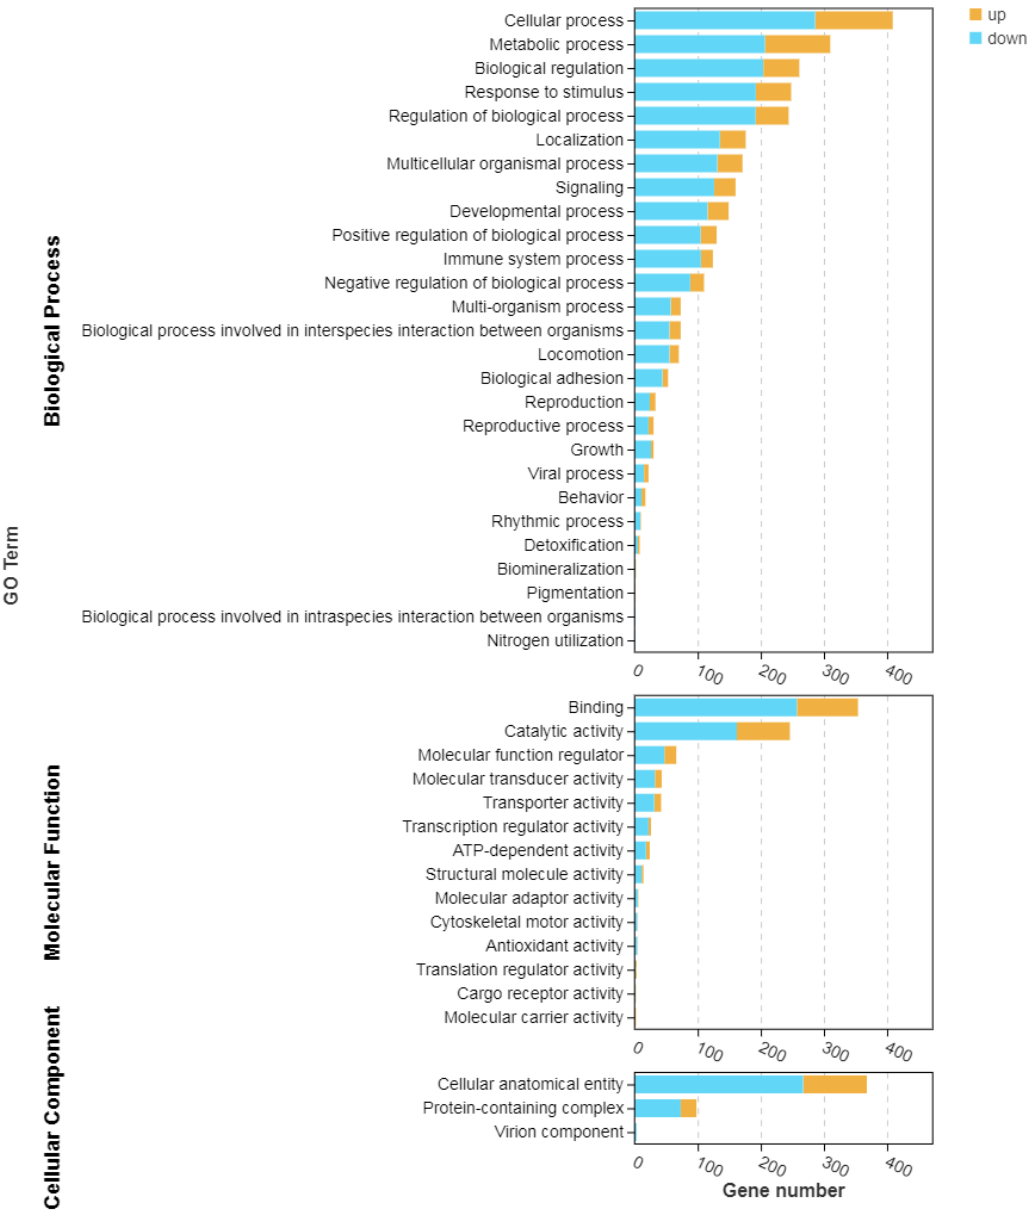

Fig. S2 Gene ontology (GO) enrichment analysis of DEGs in liver.

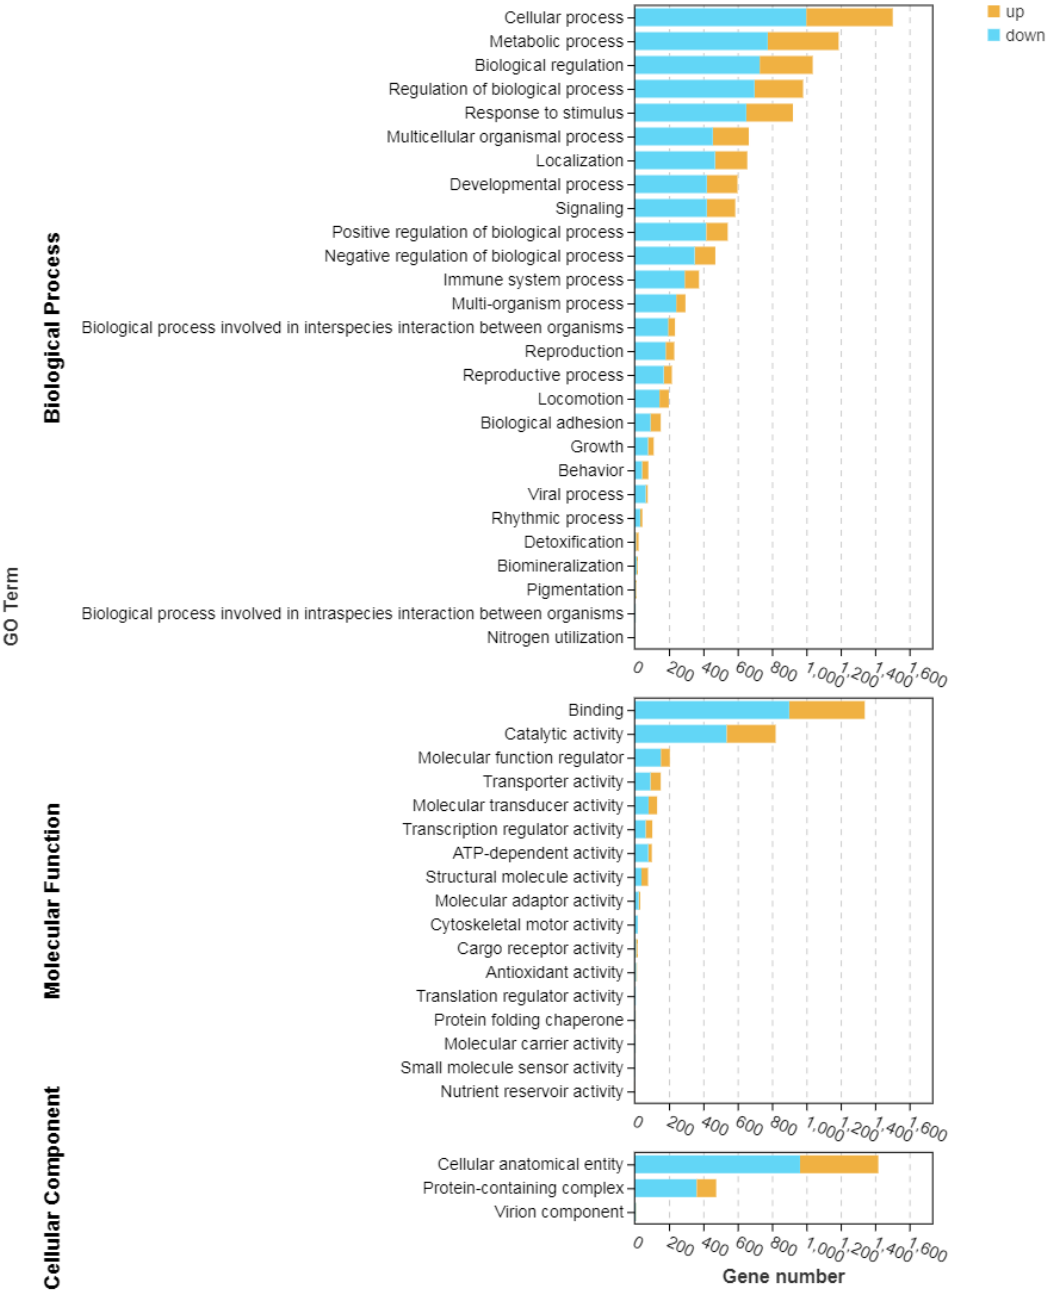

Fig. S3 Gene ontology (GO) enrichment analysis of DEGs in kidney.

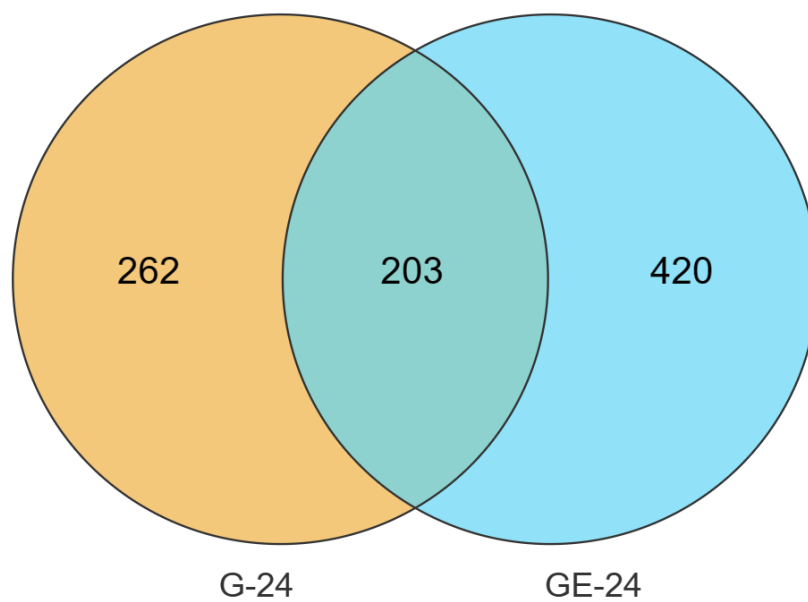

Fig. S4 Numbers and sequence proportions of Shared OTUs between uninfected and infected groups

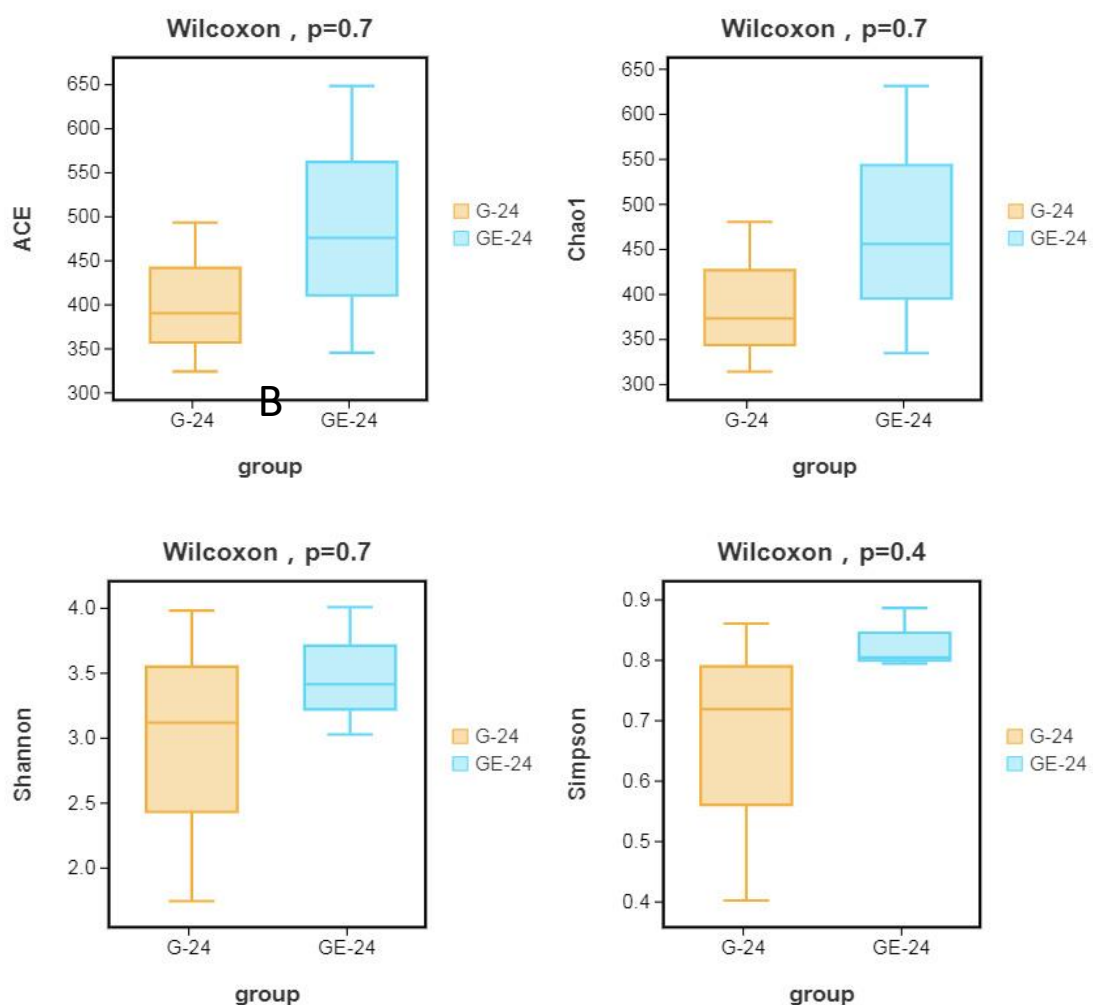

23

Fig. S5 Alpha diversity of microbial communities in the intestines of uninfected and infected black spotted frog

24

25

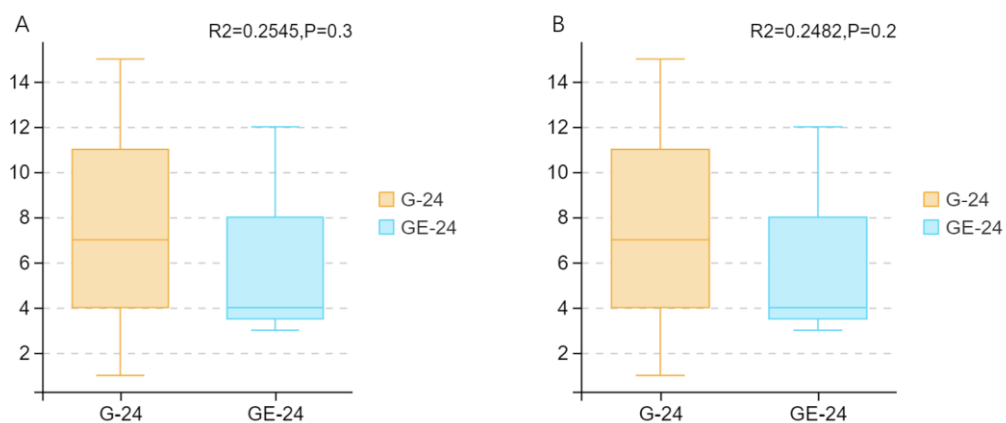

Fig. S6 Beta diversity of microbial communities in the intestines of uninfected and infected black spotted frog. (A) Bray-Curtis dissimilarity. (B) Jaccard dissimilarity.

26

27

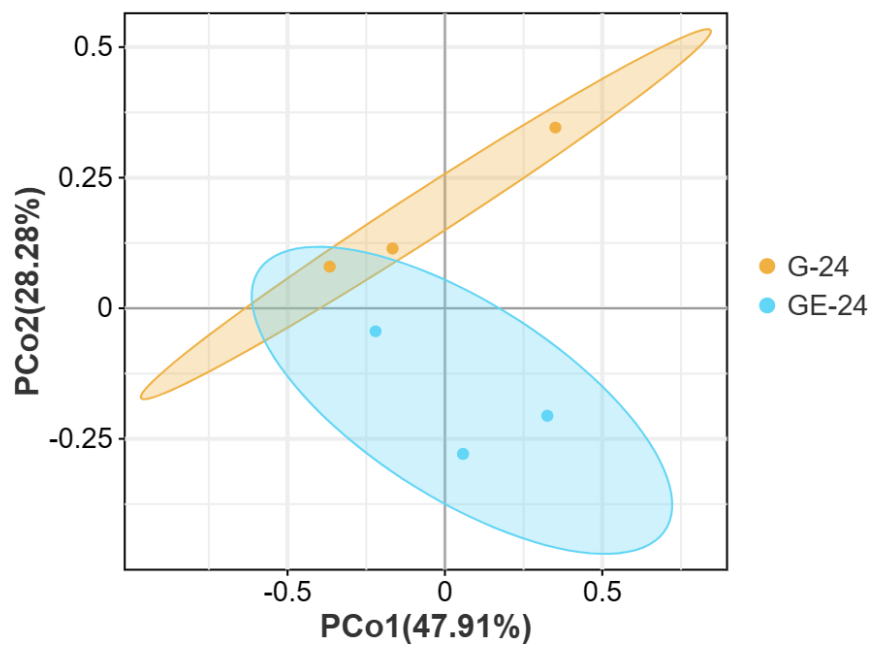

Fig. S7 Principal coordinates analysis (PCoA) of bacterial community structures
